# Supplementary material
Source: PubMed Central journal article supplement (PMC1986787)
Supplement: NIHMS27394-supplement-supplement_1.pdf [file NIHMS27394-supplement-supplement_1.pdf]

Online Supplemental Table. Association between *NAT1\*10* and *NAT2* phenotypes and risk of NHL by race.

|               | <i>NAT1*any(except *10)/<br/>*any(except *10)</i> |                 | <i>NAT1*10/*any(except *10)</i> |                   |      | <i>NAT1*10/*10</i> |                   |      | p for<br>linear<br>trend | <i>NAT1*10/any(except *10)  <br/>NAT1*10/*10</i> |             |                        |
|---------------|---------------------------------------------------|-----------------|---------------------------------|-------------------|------|--------------------|-------------------|------|--------------------------|--------------------------------------------------|-------------|------------------------|
|               | N(%)                                              | OR(95% CI)*     | N(%)                            | OR(95% CI)*       | p    | N(%)               | OR(95% CI)*       | p    |                          | N(%)                                             | OR(95% CI)* | p                      |
| <u>Whites</u> |                                                   |                 |                                 |                   |      |                    |                   |      |                          |                                                  |             |                        |
| Controls      | 401(66.4)                                         |                 | 183(30.3)                       |                   |      | 20(3.3)            |                   |      |                          |                                                  | 203(33.6)   |                        |
| All NHL       | 504(63.2)                                         | 1.00(reference) | 248(31.1)                       | 1.08 (0.86, 1.37) | 0.5  | 45(5.6)            | 1.67 (0.97, 2.89) | 0.07 | 0.1                      |                                                  | 293(36.8)   | 1.14 (0.91, 1.43) 0.2  |
| <u>Blacks</u> |                                                   |                 |                                 |                   |      |                    |                   |      |                          |                                                  |             |                        |
| Controls      | 38(37.3)                                          |                 | 46(45.1)                        |                   |      | 18(17.6)           |                   |      |                          |                                                  | 64(62.7)    |                        |
| All NHL       | 19(32.2)                                          | 1.00(reference) | 26(44.1)                        | 1.23 (0.57, 2.67) | 0.6  | 14(23.7)           | 1.74 (0.67, 4.47) | 0.3  | 0.3                      |                                                  | 40(67.8)    | 1.37 (0.66, 2.81) 0.4  |
|               | <i>NAT2 Slow</i>                                  |                 | Intermediate                    |                   |      | Rapid              |                   |      | p for<br>linear<br>trend | Intermediate/Rapid                               |             |                        |
|               | N(%)                                              | OR(95% CI)*     | N(%)                            | OR(95% CI)*       | p    | N(%)               | OR(95% CI)*       | p    |                          | N(%)                                             | OR(95% CI)* | p                      |
| <u>Whites</u> |                                                   |                 |                                 |                   |      |                    |                   |      |                          |                                                  |             |                        |
| Controls      | 396(61.0)                                         |                 | 222(34.2)                       |                   |      | 31(4.8)            |                   |      |                          |                                                  | 253(39.0)   |                        |
| All NHL       | 473(55.4)                                         | 1.00(reference) | 332(38.9)                       | 1.27 (1.02, 1.58) | 0.03 | 49(5.7)            | 1.33 (0.83, 2.14) | 0.2  | 0.03                     |                                                  | 381(44.6)   | 1.28 (1.03, 1.58) 0.02 |
| <u>Blacks</u> |                                                   |                 |                                 |                   |      |                    |                   |      |                          |                                                  |             |                        |
| Controls      | 40(35.4)                                          |                 | 58(51.3)                        |                   |      | 15(13.3)           |                   |      |                          |                                                  | 73(64.6)    |                        |
| All NHL       | 25(38.5)                                          | 1.00(reference) | 30(46.2)                        | 0.89 (0.44, 1.82) | 0.8  | 10(15.4)           | 1.04 (0.39, 2.78) | 0.9  | 0.9                      |                                                  | 40(61.5)    | 0.93 (0.48, 1.81) 0.8  |

\* OR (95% CI) adjusted for age, sex, and study center.
